# Supplementary material for: Xylyltrioxorhenium – the first arylrhenium(vii) oxide applicable as an olefin epoxidation catalyst
Source: Royal Society of Chemistry journal article supplement (doi:10.1039/c2cy20371e), 2012-07-24
Supplement: c2cy20371e.pdf [file c2cy20371e.pdf]

# Supplementary Information

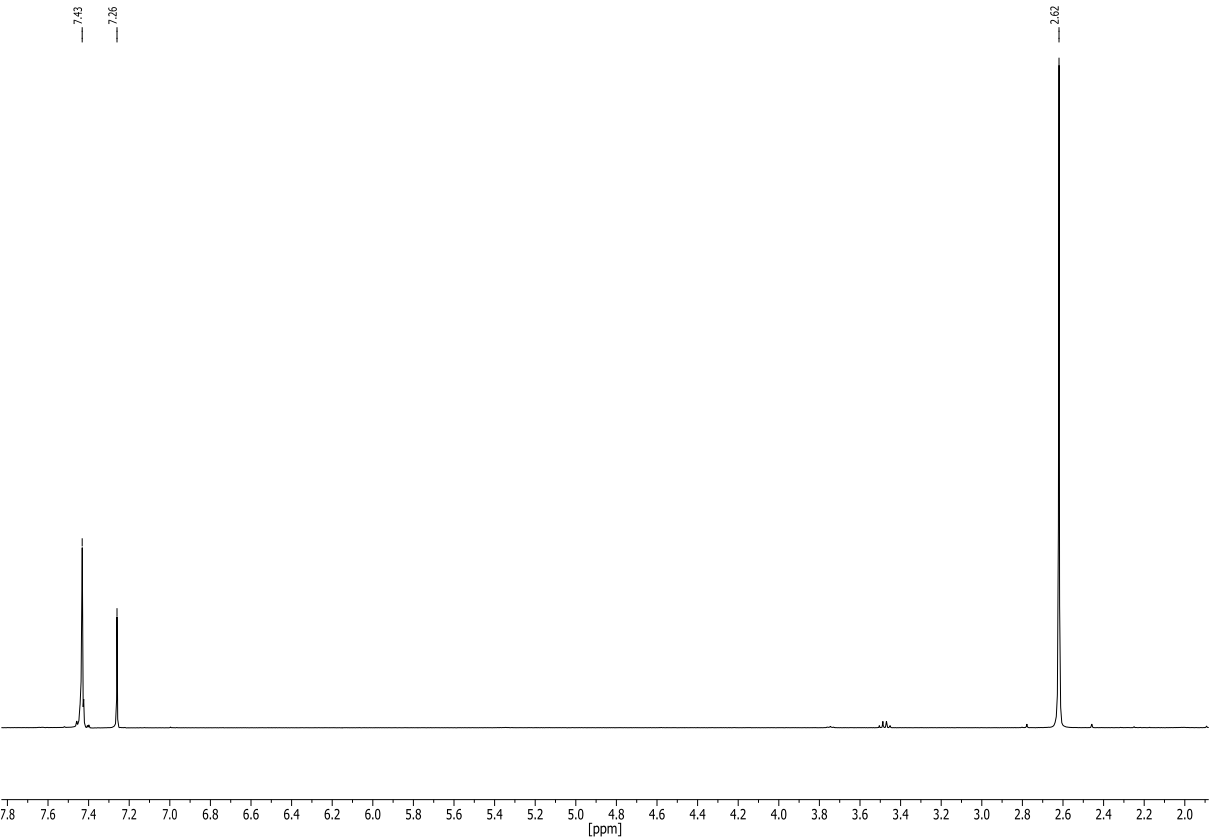

<sup>1</sup>H-NMR spectra of Xylyltrioxorhenium

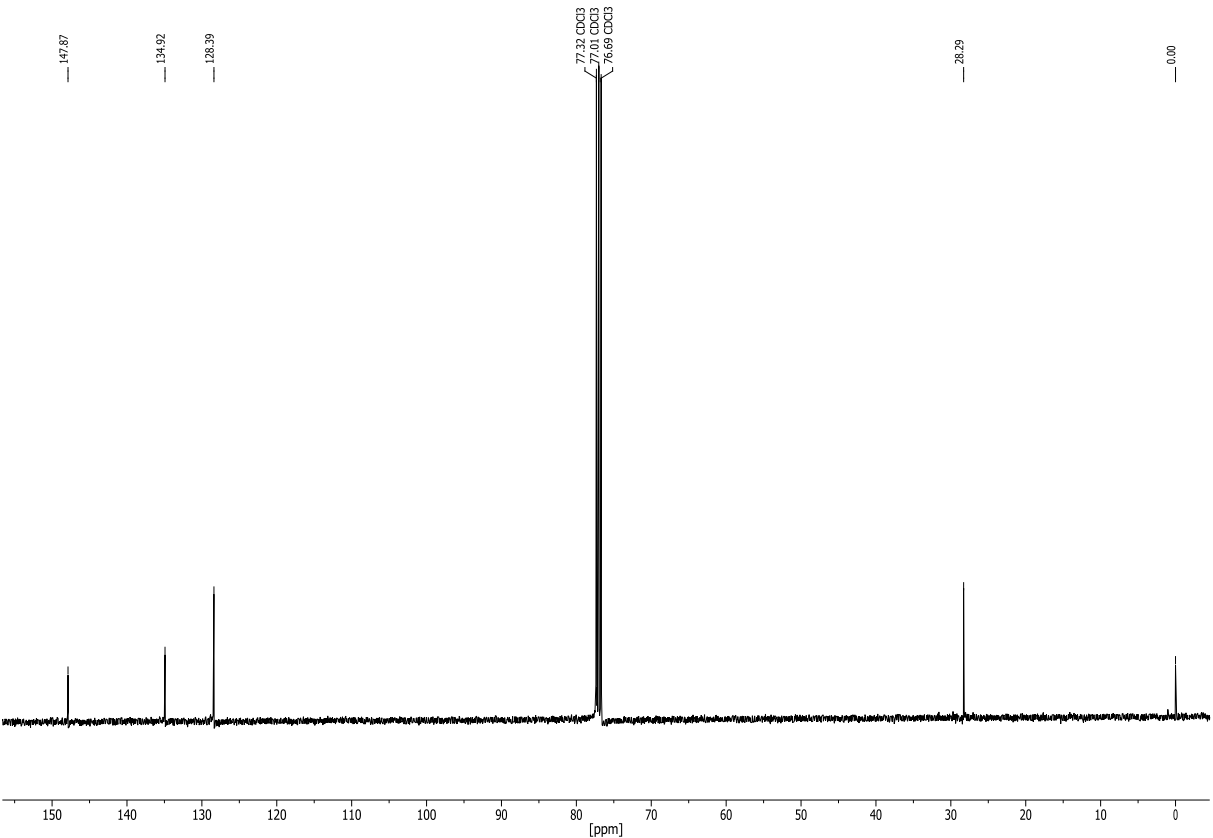

<sup>13</sup>C NMR spectra of Xylyltrioxorhenium

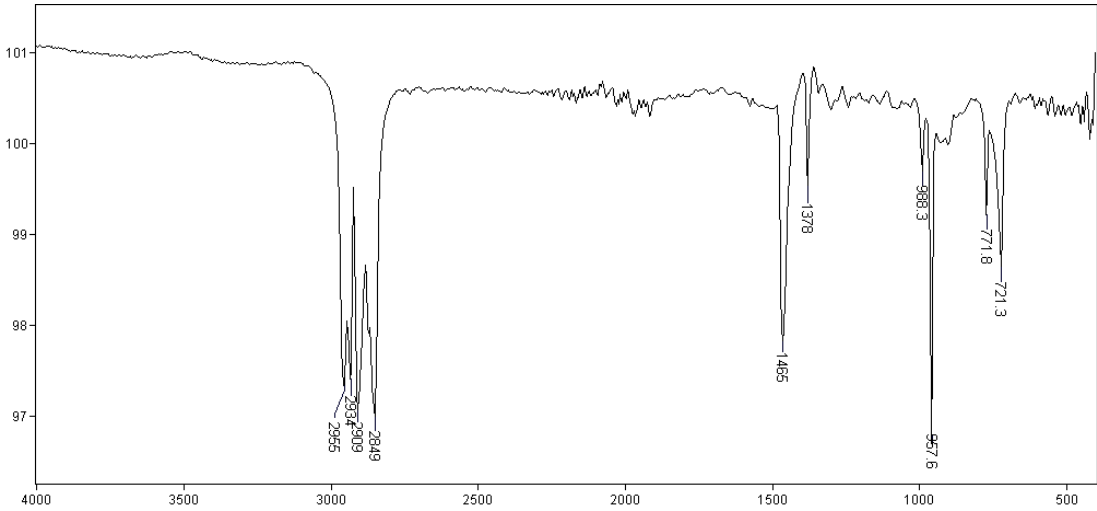

IR spectra of Xylyltrioxorhenium (solvent decane, decane subtracted).
